# Supplementary material for: Assessing health-related quality of life in Japanese children with a chronic condition: validation of the DISABKIDS chronic generic module
Source: Springer Nature journal article supplement (doi:10.1186/s12955-018-0911-1), 2018-05-02
Supplement: MOESM1 [file 15733336]

**Appendix 1: Mean, SD, Correlations, and Cronbach  $\alpha$  of Items**

| Subscale                                                            | Item                                                                                           | N                                                                                             | Mean                                                                                          | SD   | Item-total                       |                                      |                                   |      |     |      |
|---------------------------------------------------------------------|------------------------------------------------------------------------------------------------|-----------------------------------------------------------------------------------------------|-----------------------------------------------------------------------------------------------|------|----------------------------------|--------------------------------------|-----------------------------------|------|-----|------|
|                                                                     |                                                                                                |                                                                                               |                                                                                               |      | correlation of Cronbach $\alpha$ | Cronbach $\alpha$ if item is deleted | Cronbach $\alpha$ of the subscale |      |     |      |
| Self-report                                                         | Independence                                                                                   | 1. Are you confident about your future?                                                       | 122                                                                                           | 3.64 | 1.00                             | .39                                  | .72                               | 0.74 |     |      |
|                                                                     |                                                                                                | 2. Do you enjoy your life?                                                                    | 123                                                                                           | 4.50 | 0.74                             | .44                                  | .72                               |      |     |      |
|                                                                     |                                                                                                | 3. Are you able to do everything you want to do even though you have your condition?          | 123                                                                                           | 4.02 | 1.06                             | .58                                  | .67                               |      |     |      |
|                                                                     |                                                                                                | 4. Do you feel like everyone else even though you have your condition?                        | 123                                                                                           | 3.81 | 1.21                             | .55                                  | .68                               |      |     |      |
|                                                                     |                                                                                                | 5. Are you free to lead the life you want even though you have your condition?                | 123                                                                                           | 3.98 | 1.06                             | .70                                  | .63                               |      |     |      |
|                                                                     |                                                                                                | 6. Are you able to do things without your parents?                                            | 123                                                                                           | 3.59 | 1.07                             | .24                                  | .77                               |      |     |      |
|                                                                     | Emotion                                                                                        | 13. Does your condition make you feel bad about yourself?                                     | 123                                                                                           | 4.26 | 0.97                             | .62                                  | .79                               | 0.82 |     |      |
|                                                                     |                                                                                                | 14. Are you unhappy because of your condition?                                                | 123                                                                                           | 4.43 | 0.82                             | .64                                  | .79                               |      |     |      |
|                                                                     |                                                                                                | 15. Do you worry about your condition?                                                        | 123                                                                                           | 3.63 | 1.12                             | .49                                  | .81                               |      |     |      |
|                                                                     |                                                                                                | 16. Does your condition make you angry?                                                       | 123                                                                                           | 4.03 | 1.18                             | .69                                  | .77                               |      |     |      |
|                                                                     |                                                                                                | 17. Do you have fears about the future because of your condition?                             | 123                                                                                           | 4.03 | 1.14                             | .66                                  | .78                               |      |     |      |
|                                                                     |                                                                                                | 18. Does your condition get you down?                                                         | 123                                                                                           | 3.96 | 1.22                             | .70                                  | .77                               |      |     |      |
|                                                                     | Social inclusion                                                                               | 19. Does it bother you that your life has to be planned?                                      | 123                                                                                           | 3.59 | 1.31                             | .25                                  | .85                               | 0.78 |     |      |
|                                                                     |                                                                                                | 26. Do other children/adolescents understand your condition?                                  | 122                                                                                           | 3.72 | 1.30                             | .37                                  | .79                               |      |     |      |
|                                                                     |                                                                                                | 27. Do you go out with your friends?                                                          | 123                                                                                           | 3.95 | 1.09                             | .43                                  | .76                               |      |     |      |
|                                                                     |                                                                                                | 28. Are you able to play or do things with other children/adolescents (like sports)?          | 123                                                                                           | 4.28 | 1.12                             | .66                                  | .71                               |      |     |      |
|                                                                     |                                                                                                | 29. Do you think that you can do most things as well as other children/adolescents?           | 123                                                                                           | 4.02 | 1.19                             | .58                                  | .73                               |      |     |      |
|                                                                     |                                                                                                | 30. Do your friends enjoy being with you?                                                     | 123                                                                                           | 4.39 | 0.89                             | .64                                  | .73                               |      |     |      |
|                                                                     | Social                                                                                         | 31. Do you find it easy to talk about your condition to other people?                         | 123                                                                                           | 3.22 | 1.38                             | .54                                  | .74                               | 0.75 |     |      |
|                                                                     |                                                                                                | 20. Do you feel lonely because of your condition?                                             | 123                                                                                           | 4.41 | 0.94                             | .41                                  | .73                               |      |     |      |
|                                                                     |                                                                                                | 21. Do your teachers behave differently towards you than towards others?                      | 122                                                                                           | 4.33 | 1.11                             | .43                                  | .73                               |      |     |      |
|                                                                     |                                                                                                | 22. Do you have problems concentrating at school because of your condition?                   | 122                                                                                           | 4.36 | 0.99                             | .53                                  | .70                               |      |     |      |
|                                                                     |                                                                                                | 23. Do you feel that others have something against you?                                       | 123                                                                                           | 4.08 | 1.20                             | .58                                  | .69                               |      |     |      |
|                                                                     |                                                                                                | 24. Do you think that others stare at you?                                                    | 123                                                                                           | 4.46 | 0.87                             | .37                                  | .74                               |      |     |      |
|                                                                     | Physical                                                                                       | 25. Do you feel different from other children/adolescents?                                    | 123                                                                                           | 3.81 | 1.37                             | .62                                  | .67                               | 0.79 |     |      |
|                                                                     |                                                                                                | 7. Are you able to run and move as you like?                                                  | 122                                                                                           | 4.44 | 1.00                             | .47                                  | .78                               |      |     |      |
|                                                                     |                                                                                                | 8. Do you feel tired because of your condition?                                               | 123                                                                                           | 3.62 | 1.30                             | .63                                  | .74                               |      |     |      |
|                                                                     |                                                                                                | 9. Is your life ruled by your condition?                                                      | 122                                                                                           | 4.04 | 1.20                             | .70                                  | .72                               |      |     |      |
|                                                                     |                                                                                                | 10. Does it bother you that you have to explain to others what you can and can't do?          | 123                                                                                           | 3.35 | 1.47                             | .40                                  | .80                               |      |     |      |
|                                                                     |                                                                                                | 11. Is it difficult to sleep because of your condition?                                       | 120                                                                                           | 4.23 | 1.13                             | .46                                  | .78                               |      |     |      |
|                                                                     | Treatment                                                                                      | 12. Does your condition bother you when you play or do other things?                          | 122                                                                                           | 3.88 | 1.30                             | .66                                  | .73                               | 0.77 |     |      |
| 32. Does having to get help with medication from others bother you? |                                                                                                | 113                                                                                           | 4.36                                                                                          | 1.10 | .23                              | .80                                  |                                   |      |     |      |
| 33. Is it annoying for you to have to remember your medication?     |                                                                                                | 112                                                                                           | 3.49                                                                                          | 1.32 | .65                              | .70                                  |                                   |      |     |      |
| 34. Are you worried about your medication?                          |                                                                                                | 112                                                                                           | 4.31                                                                                          | 0.98 | .32                              | .78                                  |                                   |      |     |      |
| 35. Does taking medication bother you?                              |                                                                                                | 111                                                                                           | 3.46                                                                                          | 1.44 | .69                              | .69                                  |                                   |      |     |      |
| 36. Do you hate taking your medicine?                               |                                                                                                | 110                                                                                           | 4.11                                                                                          | 1.27 | .65                              | .70                                  |                                   |      |     |      |
| 37. Does taking medication disrupt everyday life?                   |                                                                                                | 111                                                                                           | 4.28                                                                                          | 1.07 | .58                              | .73                                  |                                   |      |     |      |
| Proxy-report                                                        |                                                                                                | Independence                                                                                  | 1. Is your child confident about his/her future?                                              | 121  | 3.70                             | 0.91                                 | .46                               |      | .87 | 0.86 |
|                                                                     |                                                                                                |                                                                                               | 2. Does your child enjoy his/her life?                                                        | 122  | 4.28                             | 0.71                                 | .67                               |      | .84 |      |
|                                                                     |                                                                                                |                                                                                               | 3. Is your child able to do everything they want to do even though they have their condition? | 121  | 3.91                             | 0.97                                 | .82                               |      | .81 |      |
|                                                                     | 4. Does your child feel like everyone else even though they have their condition?              |                                                                                               | 122                                                                                           | 3.66 | 1.07                             | .75                                  | .82                               |      |     |      |
|                                                                     | 5. Does your child feel free to lead the life they want even though they have their condition? |                                                                                               | 122                                                                                           | 3.76 | 1.00                             | .83                                  | .81                               |      |     |      |
|                                                                     | 6. Does your child feel able to do things without you?                                         |                                                                                               | 122                                                                                           | 3.63 | 0.96                             | .46                                  | .87                               |      |     |      |
|                                                                     | Emotion                                                                                        | 13. Does your child's condition make them feel bad about themselves?                          | 123                                                                                           | 4.01 | 0.90                             | .81                                  | .91                               | 0.92 |     |      |
|                                                                     |                                                                                                | 14. Does your child feel unhappy because of his/her condition?                                | 123                                                                                           | 4.00 | 0.91                             | .83                                  | .91                               |      |     |      |
|                                                                     |                                                                                                | 15. Does your child worry about his/her condition?                                            | 123                                                                                           | 3.58 | 0.91                             | .72                                  | .92                               |      |     |      |
|                                                                     |                                                                                                | 16. Does your child's condition make him/her angry?                                           | 123                                                                                           | 3.49 | 1.09                             | .79                                  | .91                               |      |     |      |
|                                                                     |                                                                                                | 17. Does your child have fears about the future because of his/her condition?                 | 123                                                                                           | 3.72 | 0.96                             | .81                                  | .91                               |      |     |      |
|                                                                     |                                                                                                | 18. Does your child's condition get him/her down?                                             | 123                                                                                           | 3.67 | 0.99                             | .84                                  | .90                               |      |     |      |
|                                                                     | Social inclusion                                                                               | 19. Does it bother your child that his/her life has to be planned?                            | 123                                                                                           | 3.09 | 1.12                             | .57                                  | .93                               | 0.8  |     |      |
|                                                                     |                                                                                                | 26. Does your child feel that other children/adolescents understand their condition?          | 122                                                                                           | 3.34 | 1.16                             | .30                                  | .83                               |      |     |      |
|                                                                     |                                                                                                | 27. Does your child go out with his/her friends?                                              | 123                                                                                           | 3.92 | 1.06                             | .58                                  | .76                               |      |     |      |
|                                                                     |                                                                                                | 28. Does your child feel able to play or do things with other children (like sports)?         | 123                                                                                           | 4.20 | 1.09                             | .61                                  | .76                               |      |     |      |
|                                                                     |                                                                                                | 29. Does your child think that he/she can do most things as well as other children?           | 123                                                                                           | 4.20 | 0.97                             | .66                                  | .75                               |      |     |      |
|                                                                     |                                                                                                | 30. Does your child feel that their friends enjoy being with them?                            | 122                                                                                           | 4.46 | 0.72                             | .70                                  | .75                               |      |     |      |
|                                                                     | Social                                                                                         | 31. Does your child find it easy to talk about his/her condition to other people?             | 123                                                                                           | 3.20 | 1.22                             | .60                                  | .76                               | 0.87 |     |      |
|                                                                     |                                                                                                | 20. Does your child feel lonely because of his/her condition?                                 | 123                                                                                           | 4.13 | 0.88                             | .75                                  | .84                               |      |     |      |
|                                                                     |                                                                                                | 21. Does your child feel that their teachers behave differently towards them than towards     | 123                                                                                           | 4.02 | 1.03                             | .44                                  | .89                               |      |     |      |
|                                                                     |                                                                                                | 22. Does your child feel that they have problems concentrating at school because of their     | 123                                                                                           | 4.05 | 0.97                             | .62                                  | .86                               |      |     |      |
|                                                                     |                                                                                                | 23. Does your child feel that others have something against him/her?                          | 123                                                                                           | 4.12 | 0.92                             | .79                                  | .83                               |      |     |      |
|                                                                     |                                                                                                | 24. Does your child think that others stare at him/her?                                       | 123                                                                                           | 4.06 | 1.00                             | .79                                  | .83                               |      |     |      |
|                                                                     | Physical                                                                                       | 25. Does your child feel different from other children/adolescents?                           | 123                                                                                           | 3.59 | 1.14                             | .73                                  | .84                               | 0.86 |     |      |
|                                                                     |                                                                                                | 7. Does your child feel able to run and move as he/she likes?                                 | 122                                                                                           | 4.21 | 1.10                             | .51                                  | .86                               |      |     |      |
|                                                                     |                                                                                                | 8. Does your child feel tired because of their condition?                                     | 123                                                                                           | 3.47 | 1.18                             | .70                                  | .83                               |      |     |      |
|                                                                     |                                                                                                | 9. Does your child feel that their life is ruled by their condition?                          | 122                                                                                           | 3.40 | 1.11                             | .77                                  | .81                               |      |     |      |
|                                                                     |                                                                                                | 10. Does it bother your child that they have to explain to others what they can and can't do? | 123                                                                                           | 3.37 | 1.07                             | .67                                  | .83                               |      |     |      |
|                                                                     |                                                                                                | 11. Does your child find it difficult to sleep because of their condition?                    | 122                                                                                           | 4.17 | 0.94                             | .46                                  | .87                               |      |     |      |
|                                                                     | Treatment                                                                                      | 12. Does your child's condition bother them when they play or do other activities?            | 123                                                                                           | 3.54 | 1.09                             | .80                                  | .81                               | 0.88 |     |      |
|                                                                     |                                                                                                | 32. Does having to get help with medication from others bother your child?                    | 113                                                                                           | 3.70 | 1.24                             | .58                                  | .88                               |      |     |      |
|                                                                     |                                                                                                | 33. Is it annoying for your child to have to remember his/her medication?                     | 113                                                                                           | 3.26 | 1.15                             | .79                                  | .84                               |      |     |      |
|                                                                     |                                                                                                | 34. Is your child worried about his/her medication?                                           | 113                                                                                           | 4.10 | 0.81                             | .53                                  | .88                               |      |     |      |
|                                                                     |                                                                                                | 35. Does taking medication bother your child?                                                 | 113                                                                                           | 2.70 | 1.17                             | .79                                  | .84                               |      |     |      |
|                                                                     |                                                                                                | 36. Does your child hate taking his/her medicine?                                             | 113                                                                                           | 3.73 | 1.12                             | .69                                  | .86                               |      |     |      |
|                                                                     |                                                                                                | 37. Does your child feel that taking medication disrupts his/her everyday life?               | 113                                                                                           | 3.48 | 1.06                             | .78                                  | .84                               |      |     |      |
