# Supplementary material for: Assessing health-related quality of life in Japanese children with a chronic condition: validation of the DISABKIDS chronic generic module
Source: Springer Nature journal article supplement (doi:10.1186/s12955-018-0911-1), 2018-05-02
Supplement: MOESM2 [file 15733336]

## Appendix 2: Summary of Confirmatory Factor Analysis

### Child-report

| Domain   | Model                                          | CMIN          | Df        | CMIN/df      | GFI          | CFI          | RMSEA        |
|----------|------------------------------------------------|---------------|-----------|--------------|--------------|--------------|--------------|
| Mental   | Model 0 (original)                             | 100.088       | 64        | 1.564        | 0.874        | 0.924        | 0.074        |
|          | Model 1<br>(delete item 6 and 9)               | 69.708        | 43        | 1.621        | 0.894        | 0.942        | 0.078        |
|          | Model 2<br>(error covariance correction model) | <b>43.668</b> | <b>40</b> | <b>1.092</b> | <b>0.933</b> | <b>0.992</b> | <b>0.030</b> |
| Social   | Model 0 (original)                             | 96.321        | 53        | 1.817        | 0.871        | 0.877        | 0.090        |
|          | Model 1<br>(error covariance correction model) | <b>66.542</b> | <b>51</b> | <b>1.305</b> | <b>0.902</b> | <b>0.956</b> | <b>0.055</b> |
| Physical | Model 0 (original)                             | 74.529        | 53        | 1.406        | 0.892        | 0.941        | 0.063        |
|          | Model 1<br>(delete item 32)                    | 66.115        | 43        | 1.538        | 0.896        | 0.936        | 0.073        |
|          | Model 2<br>(error covariance correction model) | <b>50.418</b> | <b>42</b> | <b>1.200</b> | <b>0.916</b> | <b>0.977</b> | <b>0.044</b> |

### Parent-report

| Domain   | Model                                          | CMIN          | Df        | CMIN/df      | GFI          | CFI          | RMSEA        |
|----------|------------------------------------------------|---------------|-----------|--------------|--------------|--------------|--------------|
| Mental   | Model 0 (original)                             | 125.385       | 64        | 1.959        | 0.856        | 0.935        | 0.096        |
|          | Model 1<br>(error covariance correction model) | <b>76.284</b> | <b>61</b> | <b>1.251</b> | <b>0.909</b> | <b>0.984</b> | <b>0.049</b> |
| Social   | Model 0 (original)                             | 137.238       | 53        | 2.589        | 0.824        | 0.875        | 0.124        |
|          | Model 1<br>(error covariance correction model) | <b>82.356</b> | <b>51</b> | <b>1.615</b> | <b>0.884</b> | <b>0.953</b> | <b>0.077</b> |
| Physical | Model 0 (original)                             | 126.862       | 53        | 2.394        | 0.824        | 0.887        | 0.116        |
|          | Model 1<br>(error covariance correction model) | <b>94.866</b> | <b>50</b> | <b>1.897</b> | <b>0.870</b> | <b>0.931</b> | <b>0.093</b> |
