# Supplementary material for: Assessing health-related quality of life in Japanese children with a chronic condition: validation of the DISABKIDS chronic generic module
Source: Springer Nature journal article supplement (doi:10.1186/s12955-018-0911-1), 2018-05-02
Supplement: MOESM3 [file 15733336]

**Appendix 31: Intercorrelation (Pearson r) between total score and sub-scales for excluding 0 and 100 scores**

**Self-report/ proxy-report**

|                  | Independence    | Emotion         | Social inclusion | Social exclusion | Physical limitation | Treatment       |
|------------------|-----------------|-----------------|------------------|------------------|---------------------|-----------------|
| Children         |                 |                 |                  |                  |                     |                 |
| Emotion          | 0.57**/0.58**   |                 |                  |                  |                     |                 |
| Social inclusion | 0.676**/0.55**  | 0.572**/0.32*   |                  |                  |                     |                 |
| Social exclusion | 0.7166**/0.64** | 0.66**/0.60**   | 0.56**/0.49**    |                  |                     |                 |
| Limitation       | 0.5748**/0.60** | 0.625**/0.66**  | 0.53**/0.35**    | 0.75**/0.72**    |                     |                 |
| Treatment        | 0.1921/0.001    | 0.4037*/0.42**  | -0.021/0.18      | -0.063/0.30*     | 0.0613/0.32*        |                 |
| Total score      | 0.773**/0.75**  | 0.878**/0.84**  | 0.761**/0.55**   | 0.821**/0.83**   | 0.874**/0.83**      | 0.3241**/0.53** |
| Adolescents      |                 |                 |                  |                  |                     |                 |
| Emotion          | 0.652**/0.71**  |                 |                  |                  |                     |                 |
| Social inclusion | 0.52**/0.43**   | 0.353**/0.21    |                  |                  |                     |                 |
| Social exclusion | 0.596**/0.53**  | 0.69**/0.57**   | 0.47**/0.56**    |                  |                     |                 |
| Limitation       | 0.6055**/0.71** | 0.612**/0.76**  | 0.52**/0.49**    | 0.74**/0.77**    |                     |                 |
| Treatment        | 0.096/0.47**    | 0.1825/0.62**   | 0.050/0.08       | 0.29127/0.35*    | 0.134/0.45**        |                 |
| Total score      | 0.8076**/0.84** | 0.7881**/0.87** | 0.7068**/0.60**  | 0.821**/0.80**   | 0.876**/0.89**      | 0.3441**/0.65** |

\*P<0.05, \*\*P<0.01
