# Supplementary material for: Assessing health-related quality of life in Japanese children with a chronic condition: validation of the DISABKIDS chronic generic module
Source: Springer Nature journal article supplement (doi:10.1186/s12955-018-0911-1), 2018-05-02
Supplement: MOESM4 [file 15733336]

**Appendix 42: Correlation coefficients (Pearson r) for total score and sub-scales with the KIDSCREEN for excluding 0 and 100 scores**

|           |                            | Independence    | Emotion          | Social inclusion | Social exclusion | Physical limitation | Treatment       | Total score      |
|-----------|----------------------------|-----------------|------------------|------------------|------------------|---------------------|-----------------|------------------|
| KIDSCREEN | Children                   |                 |                  |                  |                  |                     |                 |                  |
|           | <u>Self-report version</u> | 0.43 (p=0.002)  | 0.4952 (p=0.002) | 0.51 (p<0.001)   | 0.26 (p=0.102)   | 0.36 (p=0.014)      | 0.461 (p=0.04)  | 0.3869 (p=0.007) |
|           | <u>Parent version</u>      | 0.57 (p<0.001)  | 0.45 (p=0.001)   | 0.60 (p<0.001)   | 0.47 (p=0.001)   | 0.48 (p<0.001)      | 0.34 (p=0.020)  | 0.68 (p<0.001)   |
|           | Adolescents                |                 |                  |                  |                  |                     |                 |                  |
|           | <u>Self-report version</u> | 0.664 (p<0.001) | 0.3844 (p=0.067) | 0.61 (p<0.001)   | 0.56 (p<0.001)   | 0.60 (p<0.001)      | 0.104 (p=0.491) | 0.2771 (p=0.063) |
|           | <u>Parent version</u>      | 0.64 (p<0.001)  | 0.46 (p=0.001)   | 0.54 (p<0.001)   | 0.46 (p=0.001)   | 0.59 (p<0.001)      | 0.41 (p=0.004)  | 0.68 (p<0.001)   |

Note: All correlations are significant (P<0.01), except for the coefficient between the sub-scale of Social exclusion and the KIDSCREEN in children, and between the sub-scale of Treatment and the KIDSCREEN in adolescents for self-report.
